# Supplementary material for: Discovery of genes required for lipoteichoic acid glycosylation predicts two distinct mechanisms for wall teichoic acid glycosylation
Source: PubMed Central journal article supplement (PMC5836110; doi:10.1074/jbc.ra117.001614), 2018-01-17
Supplement: supp_RA117.001614_134884_1_supp_54414_p2gbrs.pdf [file supp_RA117.001614_134884_1_supp_54414_p2gbrs.pdf]

## Supporting Information

Discovery of genes required for lipoteichoic acid glycosylation predicts two distinct mechanism for wall teichoic acid glycosylation

Jeanine Rismondo, Matthew G. Percy, Angelika Gründling

List of Material included:

Supplemental Figure S1

Supplemental Figure S2

Supplemental Figure S3

Supplemental Table S1

Supplemental Table S2

Supplemental Table S3

## Supplemental Figures

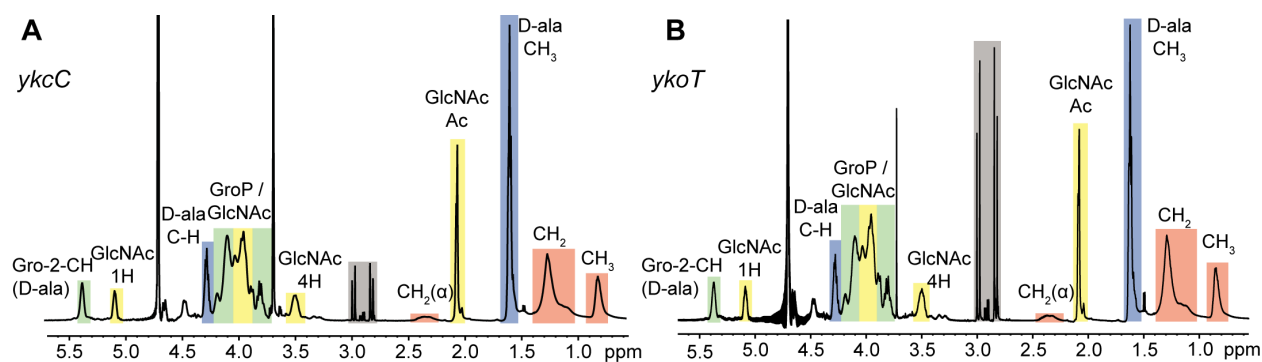

**Figure S1.** NMR spectra of LTA isolated from *B. subtilis* 168 *ykcC* and *ykoT* deletion strains. (A-B) LTA from the *B. subtilis* 168 (A) *ykcC* mutant and (B) *ykoT* mutant was purified and subsequently analyzed by <sup>1</sup>H NMR. Colored boxes and labels indicate nonexchangeable protons of the different LTA components. The different peaks for the protons and acetyl group of GlcNAc are labelled with 1H, 4H and Ac, respectively. Gray boxes indicate protons of citrate, a buffer component used for the LTA purification.

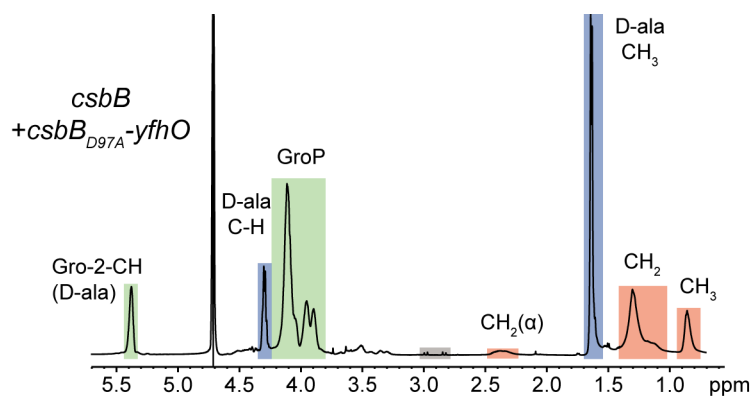

**Figure S2.** NMR spectrum of LTA isolated from the *B. subtilis* 168 *csbB* mutant strain complemented with the inactive CsbB<sub>D97A</sub> variant. LTA from *B. subtilis* strain *csbB*+*csbB*<sub>D97A</sub>-*yfhO* was isolated and analyzed by <sup>1</sup>H NMR. Colored boxes and labels indicate nonexchangeable protons of the different LTA components. Gray boxes indicate protons of citrate, a buffer component used for the LTA purification.

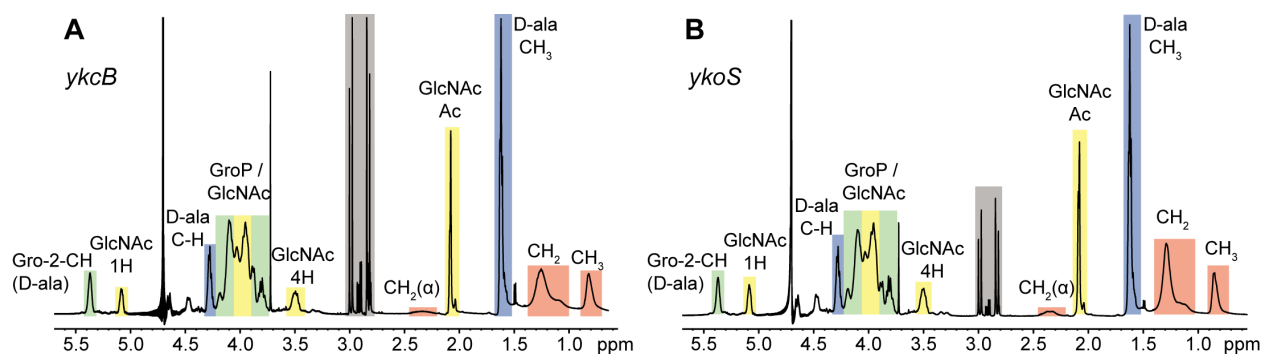

**Figure S3.** NMR spectra of LTA isolated from *B. subtilis ykcB* and *ykoS* deletion strains. NMR spectra of LTA obtained from the *B. subtilis* (A) *ykcB* mutant and (B) *ykoS* mutant. Colored boxes and labels indicate nonexchangeable protons in the LTA structure. The different peaks for the protons and acetyl group of GlcNAc are labelled with 1H, 4H and Ac, respectively. Gray boxes highlight peaks resulting from residual citrate, a buffer component used for the purification of LTA.

## Supplemental Tables

**Table S1: Bacterial strains used in this study**

| Unique ID                                    | Strain name and resistance                                                                           | Source     |
|----------------------------------------------|------------------------------------------------------------------------------------------------------|------------|
| <b><i>Escherichia coli</i> strains</b>       |                                                                                                      |            |
| ANG201                                       | <i>E. coli</i> pCN34; AmpR                                                                           | (3)        |
| ANG203                                       | <i>E. coli</i> pCN39; ErmR                                                                           | (3)        |
| ANG1264                                      | DH5 $\alpha$ pKSV7; AmpR                                                                             | (4)        |
| ANG1676                                      | <i>E. coli</i> pCN38; CamR                                                                           | (3)        |
| ANG2793                                      | XL1-Blue pKSV7- $\Delta$ <i>lmo1079</i> ( <i>lmg_00541</i> )                                         | This study |
| ANG2802                                      | TG1 pDG1662; AmpR                                                                                    | (5)        |
| ANG2905                                      | XL1-Blue pDG1662- <i>csbB</i> ; AmpR                                                                 | This study |
| ANG3303                                      | XL1-Blue pDG1662- <i>csbB</i> <sub>D97A</sub> - <i>yfhO</i> ; AmpR                                   | This study |
| ANG3508                                      | XL1-Blue pDG1662- <i>csbB-yfhO</i> ; AmpR                                                            | This study |
| ANG4232                                      | XL1-Blue pKSV7- $\Delta$ <i>gtlB</i> ( <i>lmg_00309</i> )                                            | This study |
| ANG4243                                      | XL1-Blue pIMK3; KanR                                                                                 | (6)        |
| ANG4401                                      | XL1-Blue pIMK3- <i>gtlB</i> ; KanR                                                                   | This study |
| ANG4630                                      | XL1-Blue pIMK3- <i>gtlB</i> <sub>D35A</sub> ; KanR                                                   | This study |
| ANG4631                                      | XL1-Blue pIMK3- <i>gtlB</i> <sub>S39A</sub> ; KanR                                                   | This study |
| ANG4769                                      | XL1-Blue pIMK3- <i>gtlB</i> <sub>D38A</sub> ; KanR                                                   | This study |
| <b><i>Bacillus subtilis</i> strains</b>      |                                                                                                      |            |
| ANG1691                                      | 168, trpC2                                                                                           | (7)        |
| ANG2747                                      | 168 $\Delta$ <i>ykC</i> :: <i>cam</i> ; CamR                                                         | This study |
| ANG2748                                      | 168 $\Delta$ <i>ykB</i> :: <i>kan</i> ; KanR                                                         | This study |
| ANG2749                                      | 168 $\Delta$ <i>csbB</i> :: <i>kan</i> ; KanR                                                        | This study |
| ANG2750                                      | 168 $\Delta$ <i>yfhO</i> :: <i>erm</i> ; ErmR                                                        | This study |
| ANG2751                                      | 168 $\Delta$ <i>ykoT</i> :: <i>erm</i> ; ErmR                                                        | This study |
| ANG2752                                      | 168 $\Delta$ <i>ykoS</i> :: <i>cam</i> ; CamR                                                        | This study |
| ANG3017                                      | 168 $\Delta$ <i>csbB</i> :: <i>kan amyE</i> :: <i>csbB</i> ; KanR CamR                               | This study |
| ANG3304                                      | 168 $\Delta$ <i>yfhO</i> :: <i>erm amyE</i> :: <i>csbB</i> <sub>D97A</sub> - <i>yfhO</i> ; ErmR CamR | This study |
| ANG3305                                      | 168 $\Delta$ <i>csbB</i> :: <i>kan amyE</i> :: <i>csbB</i> <sub>D97A</sub> - <i>yfhO</i> ; KanR CamR | This study |
| ANG3510                                      | 168 $\Delta$ <i>yfhO</i> :: <i>erm amyE</i> :: <i>csbB-yfhO</i> ; ErmR CamR                          | This study |
| <b><i>Listeria monocytogenes</i> strains</b> |                                                                                                      |            |
| ANG1263                                      | 10403S; StrepR                                                                                       | (8)        |
| ANG1386                                      | 10403S $\Delta$ <i>ltaS</i> ; StrepR                                                                 | (9)        |
| ANG2325                                      | 10403S $\Delta$ <i>gtlA</i> ; StrepR                                                                 | (10)       |
| ANG2794                                      | 10403S $\Delta$ <i>lmo1079</i> ; StrepR                                                              | This study |
| ANG4264                                      | 10403S $\Delta$ <i>gtlB</i> ; StrepR                                                                 | This study |
| ANG4443                                      | 10403S $\Delta$ <i>gtlB</i> pIMK3- <i>gtlB</i> ; StrepR KanR                                         | This study |
| ANG4637                                      | 10403S $\Delta$ <i>gtlB</i> pIMK3; StrepR KanR                                                       | This study |
| ANG4638                                      | 10403S $\Delta$ <i>gtlB</i> pIMK3- <i>gtlB</i> <sub>S39A</sub> ; StrepR KanR                         | This study |
| ANG4648                                      | 10403S $\Delta$ <i>gtlB</i> pIMK3- <i>gtlB</i> <sub>D35A</sub> ; StrepR KanR                         | This study |
| ANG4775                                      | 10403S $\Delta$ <i>gtlB</i> pIMK3- <i>gtlB</i> <sub>D38A</sub> ; StrepR KanR                         | This study |

**Table S2: Primers used in this study**

| Number  | Name                        | Sequence                                          |
|---------|-----------------------------|---------------------------------------------------|
| ANG1527 | 5-BamHI-1kb- <i>lmo1079</i> | CGCGGATCCCAAACGTTCTCCTTCAAATCATAGGCG              |
| ANG1528 | front-int- <i>lmo1079</i>   | ACGCTTTCTAAGCTTTTTCCATTTTTTTCTAACATCTTCCAT        |
| ANG1529 | back-int- <i>lmo1079</i>    | AAATGGAAAAAGCTTAGAAAGCGTAAAAATAAAACACAATAA        |
| ANG1530 | 3-KpnI-1kb- <i>lmo1079</i>  | CGGGGTACCGCCCTAAAATCCCAAGAACTCGTGAGCG             |
| ANG1534 | 5-1kb-YkcC                  | GTCGCTCTTGTTTCATCTGTACCGCAATCAG                   |
| ANG1535 | front-ApaI-YkcC             | CCGGGGCCCCACAGGTACAACAATTGAATATTGAATATG           |
| ANG1536 | back-XhoI-YkcC              | CCGCTCGAGAAAAGACTCTATAGAGACCAGCATATGTCA           |
| ANG1537 | 3-1kb-YkcC                  | CAGCATGCTTGATCTAGAGCAAGTGCCGC                     |
| ANG1540 | 5-1kb-YkcB                  | GCAGCGACTTGTGCTGACTGCTGATGAGG                     |
| ANG1541 | front-ApaI-YkcB             | CCGGGGCCCCGATATCCAGCTCGCGTTTTTTCTTTTCCAC          |
| ANG1542 | back-XhoI-YkcB              | CCGCTCGAGCGGAATGAATCAGTCAGCAACATTATACG            |
| ANG1543 | 3-1kb-YkcB                  | GCTGGATCACAATAAGTGATGACCAGCC                      |
| ANG1546 | 5-1kb-CsbB                  | CATCGGGCTTATTACGCAATTCCTGATG                      |
| ANG1547 | front-ApaI-CsbB             | CCGGGGCCCCGACGGGATAATAATCGAGATTAATCCTTGC          |
| ANG1548 | back-XhoI-CsbB              | CCGCTCGAGGAACGAATTAATAAGCATGCGGCGTCTGAC           |
| ANG1549 | 3-1kb-CsbB                  | CCGGCACAAACGCCGCCGCACTGATGCC                      |
| ANG1552 | 5-1kb-YfhO                  | GAAGAAGGGTATGACCAAGTCATTGCC                       |
| ANG1553 | front-ApaI-YfhO             | CCGGGGCCCCGTCAAATAATAATTTTTTAAATACGATCAT          |
| ANG1554 | back-XhoI-YfhO              | CCGCTCGAGGCTGTTTTTATATAAGACGTAAAAAGCCC            |
| ANG1555 | 3-1kb-YfhO                  | GGCTCCGGATATTGATACTGTGTAAAGC                      |
| ANG1558 | 5-1kb-YkoT                  | CTGCTGTTCAAACGAAATCGGACAAAGCC                     |
| ANG1559 | front-ApaI-YkoT             | CCGGGGCCCCGACGACGATGGTTAATACTGGCTGTGACTG          |
| ANG1560 | back-XhoI-YkoT              | CCGCTCGAGCGCCAGGAAAAAGAGCGGTTAGAAAAAAG            |
| ANG1561 | 3-1kb-YkoT                  | TCAGTATATGATTGAAGTCAGTGACTACC                     |
| ANG1564 | 5-1kb-YkoS                  | GCCCGCCGTGAAAATGCCCTGACAGCAGG                     |
| ANG1565 | front-ApaI-YkoS             | CCGGGGCCCCGTTTCTTTTTTTTTGTTGTCTCATCAATCGTAAC      |
| ANG1566 | back-XhoI-YkoS              | CCGCTCGAGGCTGGCGCATTATTATATGAAACAAGATAAG<br>G     |
| ANG1567 | 3-1kb-YkoS                  | CAAATGGATATGATAAGAGACGCCAGCC                      |
| ANG1624 | 5-BamHI-CsbB-with P         | CGCGGATCCGCTAAAATTTCTCTCCATCCGTCTGTC              |
| ANG1625 | 3-HinDIII-CsbB              | CCCAAGCTTTCAGTGCATTTTTGTCAGACGCCGCATGC            |
| ANG1628 | 3-HinDIII-YfhO              | CCCAAGCTTCTATATAGAGCCGGGCTTTTTACGTCTT             |
| ANG1731 | CsbB-D97A-Fwd               | CGGTTATTGTCATGGATGCCGCCCTGCAGCATCCGACATATTTG<br>C |
| ANG1732 | CsbB-D97A-Back              | GCAAATATGTCGGATGCTGCAGGGCGGCATCCATGACAATAAC<br>CG |
| ANG2516 | Lmo0626 up fw               | GCGCGGATCCATTATCTGTATCGGGAGTTGG                   |
| ANG2517 | Lmo0626 up rev              | TAAATAGATTTTAATAATTAGCCACTTATGCTTTTTCCACAT        |
| ANG2518 | Lmo0626 down fw             | TGGCTAATTATTAATAATCTATTTATACAAAGCAACTAATTA        |
| ANG2519 | Lmo0626 down rev            | GCGCGGTACCCCTGAGATGATACTGTAGAGATATTC              |
| ANG2708 | pIMK3-lmo0626 fw            | GCGCCCATGGGGTGAAAAAGCATAAGTGGCTAATT               |

|         |                   |                                         |
|---------|-------------------|-----------------------------------------|
| ANG2709 | pIMK3-lmo0626 rev | GCGCGTCGACTTAATTAGTTGCTTTGTATAAAATAGATT |
| ANG2790 | Lmo0626 D35A fw   | GATTCATGCTAACTTGGATTCTAATGCGAC          |
| ANG2791 | Lmo0626 D35A rev  | CCAAGTTAGCATGAATCCTTACATGACTAT          |
| ANG2792 | Lmo0626 S39A fw   | CTTGGATGCTAATGCGACTTGGTACAAAATG         |
| ANG2793 | Lmo0626 S39A rev  | GCATTAGCATCCAAGTTATCATGAATCC            |
| ANG2901 | Lmo0626 D38A fw   | GATAACTTGGCTTCTAATGCGACTTGGTACAAAATG    |
| ANG2902 | Lmo0626 D38A rev  | GCATTAGAAGCCAAGTTATCATGAATCCTTAC        |

---

**Table S3: Homologs of *L. monocytogenes* 10403S proteins required for WTA and LTA glycosylation in a select number of Gram-positive bacteria.**

| <i>L. monocytogenes</i> WTA              | Lmo2550 (Lm)                                                                                     | Lmo1079 (YfhO) (Lm)               |
|------------------------------------------|--------------------------------------------------------------------------------------------------|-----------------------------------|
| <i>B. subtilis</i> 168                   | BSU12890 (YkcC) (2e-95 45%)<br>BSU08600 (CsbB) (2e-86 44%)<br>BSU13390 (YkoT) (4e-50 35%)        | BSU08610 (YfhO) (2e-38 23%)       |
| <i>B. cereus</i> ATCC 14579              | BC5432 (8e-87 43%)                                                                               | BC5431 (8e-46 24%)                |
| <i>B. cereus</i> AH820                   | BCAH820_5528 (2e-88 40%)                                                                         | -                                 |
| <i>B. anthracis</i> Ames                 | BA_5684 (2e-88 40%)                                                                              | -                                 |
| <i>B. anthracis</i> Sterne 34F2          | BAS5287 (2e-88 40%)                                                                              | -                                 |
| <i>L. monocytogenes</i> 10403S (1/2a)    | <b>Lmrg_01697 (0.0 100%)</b><br>Lmrg_02032 (6e-87 42%)                                           | <b>Lmrg_00541 (0.0 100%)</b>      |
| <i>L. monocytogenes</i> EGDe (1/2a)      | <b>Lmo2550 (0.0 100%)</b><br>Lmo0933 (GtlA) (6e-87 42%)                                          | <b>Lmo1079 (0.0 99%)</b>          |
| <i>L. monocytogenes</i> SLCC 2755 (1/2b) | <b>LMOSLCC2755_2556 (0.0 100%)</b><br>LMOSLCC2755_0934 (2e-86 42%)                               | <b>LMOSLCC2755_1077 (0.0 99%)</b> |
| <i>L. monocytogenes</i> SLCC 2372 (1/2c) | <b>LMOSLCC2372_2614 (0.0 100%)</b><br>LMOSLCC2372_0946 (6e-87 42%)                               | <b>LMOSLCC2372_1093 (0.0 99%)</b> |
| <i>L. monocytogenes</i> SLCC 7179 (3a)   | <b>LMOSLCC7179_2462 (0.0 100%)</b><br>LMOSLCC7179_0913 (6e-87 42%)                               | <b>LMOSLCC7179_1060 (0.0 99%)</b> |
| <i>L. monocytogenes</i> SLCC 2540 (3b)   | <b>LMOSLCC2540_2583 (0.0 100%)</b><br>LMOSLCC2540_0932 (2e-86 42%)                               | <b>LMOSLCC2540_1075 (0.0 99%)</b> |
| <i>L. monocytogenes</i> SLCC 2479 (3c)   | <b>LMOSLCC2479_2613 (0.0 100%)</b><br>LMOSLCC2479_0945 (6e-87 42%)                               | <b>LMOSLCC2479_1092 (0.0 99%)</b> |
| <i>L. monocytogenes</i> HCC 23 (4a)      | LMHCC_1552 (9e-64 36%)                                                                           | -                                 |
| <i>L. monocytogenes</i> F2365 (4b)       | LMOF2365_1095 (1e-57 34%)                                                                        | -                                 |
| <i>L. monocytogenes</i> SLCC 2376 (4c)   | LMOSLCC2376_1047 (8e-64 36%)                                                                     | -                                 |
| <i>L. monocytogenes</i> ATCC 19117(4d)   | LMOATCC19117_1097 (2e-57 35%)                                                                    | -                                 |
| <i>L. monocytogenes</i> SLCC 2378 (4e)   | LMOSLCC2378_1092 (1e-57 34%)                                                                     | -                                 |
| <i>L. monocytogenes</i> SLCC 2482 (7)    | <b>LMOSLCC2482_2554 (0.0 99%)</b><br>LMOSLCC2482_0978 (2e-86 42%)                                | <b>LMOSLCC2482_1122 (0.0 99%)</b> |
| <i>L. innocua</i> CLIP11262              | <b>Lin2695 (0.0 92%)</b><br>Lin1066 (1e-62 33%)                                                  | -                                 |
| <i>L. ivanovii</i> WSLC3009              | AX25_04770 (4e-90 43%)                                                                           | -                                 |
| <i>L. seeligeri</i> SLCC3954             | <b>Lse_2456 (0.0 95%)</b><br>Lse_0831 (2e-89 42%)                                                | <b>Lse_0969 (0.0 88%)</b>         |
| <i>S. aureus</i> USA300 FRP3757          | SAUSA300_0689 (1e-81 40%)                                                                        | SAUSA300_1135 (8e-20 22%)         |
| <i>S. epidermidis</i> RP62A              | SERP0363 (2e-79 43%)                                                                             | SERP0809 (1e-25 23%)              |
| <i>E. faecalis</i> ATCC 29212            | <b>DR75_1002 (8e-145 63%)</b><br>DR75_1603 (7e-82 38%)                                           | -                                 |
| <i>E. faecium</i> DO                     | HMPREF0351_10563 (2e-79 38%)                                                                     | -                                 |
| <i>E. faecium</i> T110                   | M395_02690 (8e-76 38%)                                                                           | M395_01445 (9e-67 26%)            |
| <i>S. agalactiae</i> NEM316              | Gbs1545 (1e-81 38%)                                                                              | -                                 |
| <i>S. pyogenes</i> HSC5                  | L897_02290 (4e-75 36%)                                                                           | -                                 |
| <i>S. pneumoniae</i> R6                  | Spr1459 (GtrB) (3e-80 38%)                                                                       | Spr2036 (7e-13 29%)               |
| <i>S. pneumoniae</i> Tigr4               | SP_1606 (2e-80 38%)                                                                              | SP_2231 (7e-13 29%)               |
| <i>L. lactis</i> MG1363                  | Llmg_0134 (2e-80 39%)<br>Llmg_0114 (5e-75 40%)<br>Llmg_0600 (2e-74 41%)<br>Llmg_1521 (3e-62 35%) | -                                 |
| <i>L. casei</i> BL23                     | LCABL_12710 (RfaG) (8e-83 38%)<br>LCABL_07730 (YkcC) (6e-81 38%)<br>LCABL_28680 (8e-65 36%)      | -                                 |
| <i>M. tuberculosis</i> H37Rv             | Rv1500 (2e-34 28%)                                                                               | -                                 |

**Table S3: continued**

| <i>L. monocytogenes</i> LTA              | GtlA (Lm)                                                                                         | GtlB (Lm)                          |
|------------------------------------------|---------------------------------------------------------------------------------------------------|------------------------------------|
| <i>B. subtilis</i> 168                   | <b>BSU12890 (YkcC) (3e-158 65%)</b><br>BSU08600 (CsbB) (7e-68 39%)<br>BSU13390 (YkoT) (1e-60 41%) | BSU13380 (YkoS) (0.0 49%)          |
| <i>B. cereus</i> ATCC 14579              | BC5432 (1e-73 41%)                                                                                | -                                  |
| <i>B. cereus</i> AH820                   | BCAH820_5528 (1e-112 51%)                                                                         | BCAH820_2601 (0.0 49%)             |
| <i>B. anthracis</i> Ames                 | BA_5684 (9e-113 51%)                                                                              | -                                  |
| <i>B. anthracis</i> Sterne 34F2          | BAS5287 (9e-113 51%)                                                                              | -                                  |
| <i>L. monocytogenes</i> 10403S (1/2a)    | <b>Lmrg_02032 (0.0 100%)</b><br>Lmrg_0.1697 (6e-87 42%)                                           | <b>Lmrg_00309 (0.0 100%)</b>       |
| <i>L. monocytogenes</i> EGDe (1/2a)      | <b>Lmo0933 (GtlA) (0.0 99%)</b><br>Lmo2550 (6e-87 42%)                                            | <b>Lmo0626 (0.0 99%)</b>           |
| <i>L. monocytogenes</i> SLCC 2755 (1/2b) | <b>LMOSLCC2755_0934 (0.0 99%)</b><br>LMOSLCC2755_2556 (6e-87 42%)                                 | <b>LMOSLCC2755_0632 (0.0 96%)</b>  |
| <i>L. monocytogenes</i> SLCC 2372 (1/2c) | <b>LMOSLCC2372_0946 (0.0 100%)</b><br>LMOSLCC2372_2614 (6e-87 42%)                                | <b>LMOSLCC2372_0635 (0.0 99%)</b>  |
| <i>L. monocytogenes</i> SLCC 7179 (3a)   | <b>LMOSLCC7179_0913 (0.0 100%)</b><br>LMOSLCC7179_2462 (6e-87 42%)                                | <b>LMOSLCC7179_0602 (0.0 99%)</b>  |
| <i>L. monocytogenes</i> SLCC 2540 (3b)   | <b>LMOSLCC2540_0932 (0.0 99%)</b><br>LMOSLCC2540_2583 (6e-87 42%)                                 | <b>LMOSLCC2540_0631 (0.0 96%)</b>  |
| <i>L. monocytogenes</i> SLCC 2479 (3c)   | <b>LMOSLCC2479_0945 (0.0 99%)</b><br>LMOSLCC2479_2613 (6e-87 42%)                                 | <b>LMOSLCC2479_0631 (0.0 99%)</b>  |
| <i>L. monocytogenes</i> HCC 23 (4a)      | LMHCC_1552 (4e-76 42%)                                                                            | <b>LMHCC_2004 (0.0 96%)</b>        |
| <i>L. monocytogenes</i> F2365 (4b)       | LMOF2365_1095 (3e-77 43%)                                                                         | <b>LMOF2365_0655 (0.0 96%)</b>     |
| <i>L. monocytogenes</i> SLCC 2376 (4c)   | LMOSLCC2376_1047 (4e-76 42%)                                                                      | <b>LMOSLCC2376_0605 (0.0 96%)</b>  |
| <i>L. monocytogenes</i> ATCC 19117(4d)   | LMOATCC19117_1097 (8e-75 43%)                                                                     | <b>LMOATCC19117_0656 (0.0 96%)</b> |
| <i>L. monocytogenes</i> SLCC 2378 (4e)   | LMOSLCC2378_1092 (2e-77 43%)                                                                      | <b>LMOSLCC2378_0650 (0.0 96%)</b>  |
| <i>L. monocytogenes</i> SLCC 2482 (7)    | <b>LMOSLCC2482_0978 (0.0 99%)</b><br>LMOSLCC2482_2554 (2e-85 42%)                                 | <b>LMOSLCC2482_0628 (0.0 96%)</b>  |
| <i>L. innocua</i> CLIP11262              | Lin2695 (3e-87 42%)<br>Lin1066 (9e-80 41%)                                                        | <b>Lin0635 (0.0 93%)</b>           |
| <i>L. ivanovii</i> WSLC3009              | <b>AX25_04770 (0.0 91%)</b>                                                                       | <b>AX25_03160 (0.0 88%)</b>        |
| <i>L. seeligeri</i> SLCC3954             | <b>Lse_0831 (0.0 92%)</b><br>Lse_2456 (1e-87 43%)                                                 | <b>Lse_0535 (0.0 87%)</b>          |
| <i>S. aureus</i> USA300 FRP3757          | SAUSA300_0689 (3e-70 39%)                                                                         | -                                  |
| <i>S. epidermidis</i> RP62A              | SERP0363 (5e-69 40%)                                                                              | -                                  |
| <i>E. faecalis</i> ATCC 29212            | DR75_1603 (1e-87 42%)<br>DR75_1002 (8e-67 36%)                                                    | -                                  |
| <i>E. faecium</i> DO                     | HMPREF0351_10563 (6e-66 39%)                                                                      | -                                  |
| <i>E. faecium</i> T110                   | M395_02690 (5e-64 40%)                                                                            | -                                  |
| <i>S. agalactiae</i> NEM316              | Gbs1545 (1e-69 37%)                                                                               | -                                  |
| <i>S. pyogenes</i> HSC5                  | L897_02290 (2e-68 36%)                                                                            | -                                  |
| <i>S. pneumoniae</i> R6                  | Spr1459 (GtrB) (7e-73 38%)                                                                        | -                                  |
| <i>S. pneumoniae</i> Tigr4               | SP_1606 (1e-72 39%)                                                                               | -                                  |
| <i>L. lactis</i> MG1363                  | Llmg_1521 (4e-72 41%)<br>Llmg_0134 (1e-68 37%)<br>Llmg_0114 (1e-64 38%)<br>Llmg_0600 (5e-64 40%)  | -                                  |
| <i>L. casei</i> BL23                     | LCABL_07730 (YkcC) (8e-106 49%)<br>LCABL_28680 (2e-68 38%)<br>LCABL_12710 (RfaG) (8e-65 37%)      | -                                  |
| <i>M. tuberculosis</i> H37Rv             | Rv1500 (2e-41 30%)                                                                                | -                                  |

*L. monocytogenes* 10403S proteins used for the BLASTP searches are listed on top of the respective column and query species in the left column. Protein name or locus tag of identified homologs are given with e-value and % identity in parenthesis. Homologs with > 60% identity are shown in bold.



## References

1. Waterhouse, A. M., Procter, J. B., Martin, D. M., Clamp, M., and Barton, G. J. (2009) Jalview Version 2--a multiple sequence alignment editor and analysis workbench. *Bioinformatics* **25**, 1189-1191
2. Crooks, G. E., Hon, G., Chandonia, J. M., and Brenner, S. E. (2004) WebLogo: a sequence logo generator. *Genome Res* **14**, 1188-1190
3. Charpentier, E., Anton, A. I., Barry, P., Alfonso, B., Fang, Y., and Novick, R. P. (2004) Novel cassette-based shuttle vector system for gram-positive bacteria. *Appl Environ Microbiol* **70**, 6076-6085
4. Smith, K., and Youngman, P. (1992) Use of a new integrational vector to investigate compartment-specific expression of the *Bacillus subtilis* *spoIIM* gene. *Biochimie* **74**, 705-711
5. Guerout-Fleury, A. M., Frandsen, N., and Stragier, P. (1996) Plasmids for ectopic integration in *Bacillus subtilis*. *Gene* **180**, 57-61
6. Monk, I. R., Gahan, C. G., and Hill, C. (2008) Tools for functional postgenomic analysis of *Listeria monocytogenes*. *Appl Environ Microbiol* **74**, 3921-3934
7. Burkholder, P. R., and Giles, N. H., Jr. (1947) Induced biochemical mutations in *Bacillus subtilis*. *Am J Bot* **34**, 345-348
8. Bishop, D. K., and Hinrichs, D. J. (1987) Adoptive transfer of immunity to *Listeria monocytogenes*. The influence of in vitro stimulation on lymphocyte subset requirements. *J Immunol* **139**, 2005-2009
9. Webb, A. J., Karatsa-Dodgson, M., and Gründling, A. (2009) Two-enzyme systems for glycolipid and polyglycerolphosphate lipoteichoic acid synthesis in *Listeria monocytogenes*. *Mol Microbiol* **74**, 299-314
10. Percy, M. G., Karinou, E., Webb, A. J., and Gründling, A. (2016) Identification of a Lipoteichoic Acid Glycosyltransferase Enzyme Reveals that GW-Domain-Containing Proteins Can Be Retained in the Cell Wall of *Listeria monocytogenes* in the Absence of Lipoteichoic Acid or Its Modifications. *J Bacteriol* **198**, 2029-2042
